# Supplementary material
Source: PubMed Central journal article supplement (PMC3117163)
Supplement: mmc1.pdf [file mmc1.pdf]

## **Supporting Information**

**Minor complexes at work: light-harvesting by Carotenoids in the Photosystem II antenna complexes CP24 and CP26**

**Alessandro Marin, Francesca Passarini, Ivo H. M. van Stokkum, Rienk van Grondelle and Roberta Croce.**

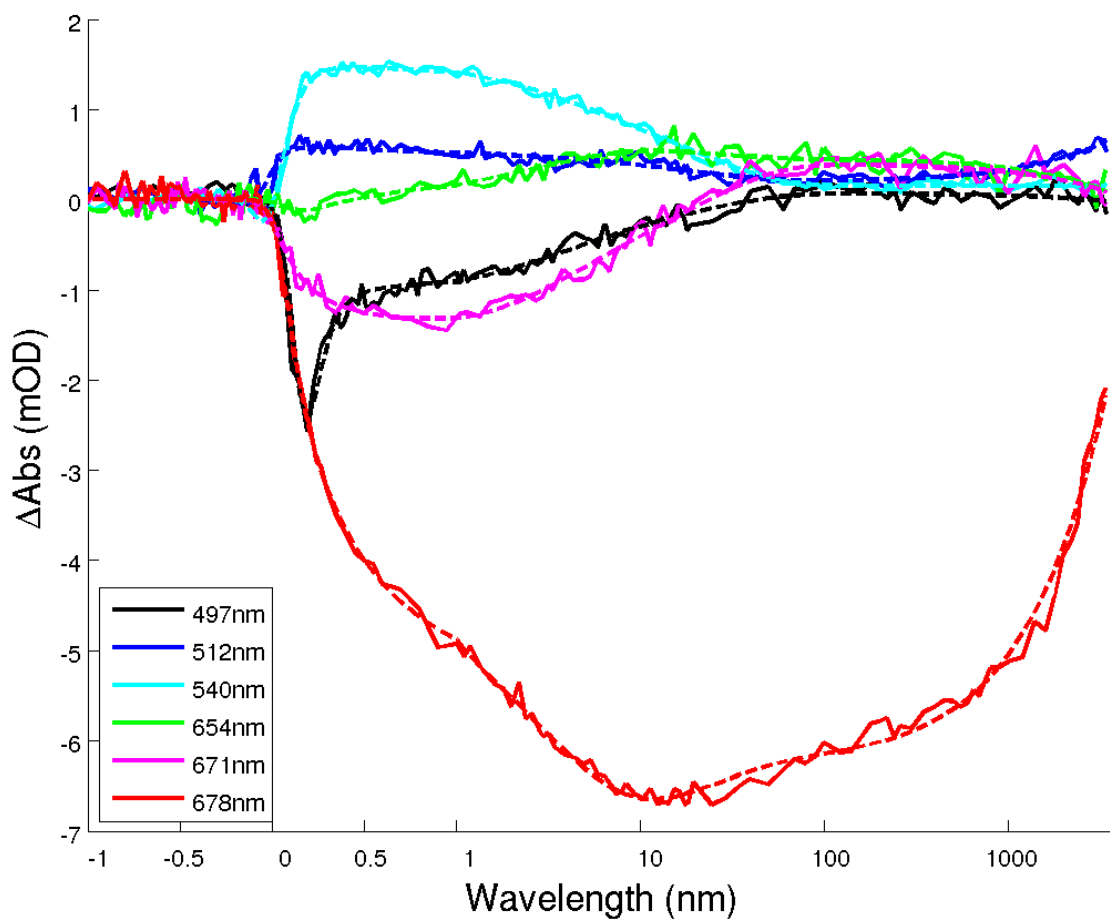

**FIGURE S1.** Pump probe traces (solid) and fit (dashed) of CP26 probed at selected wavelengths as indicated in the legend.

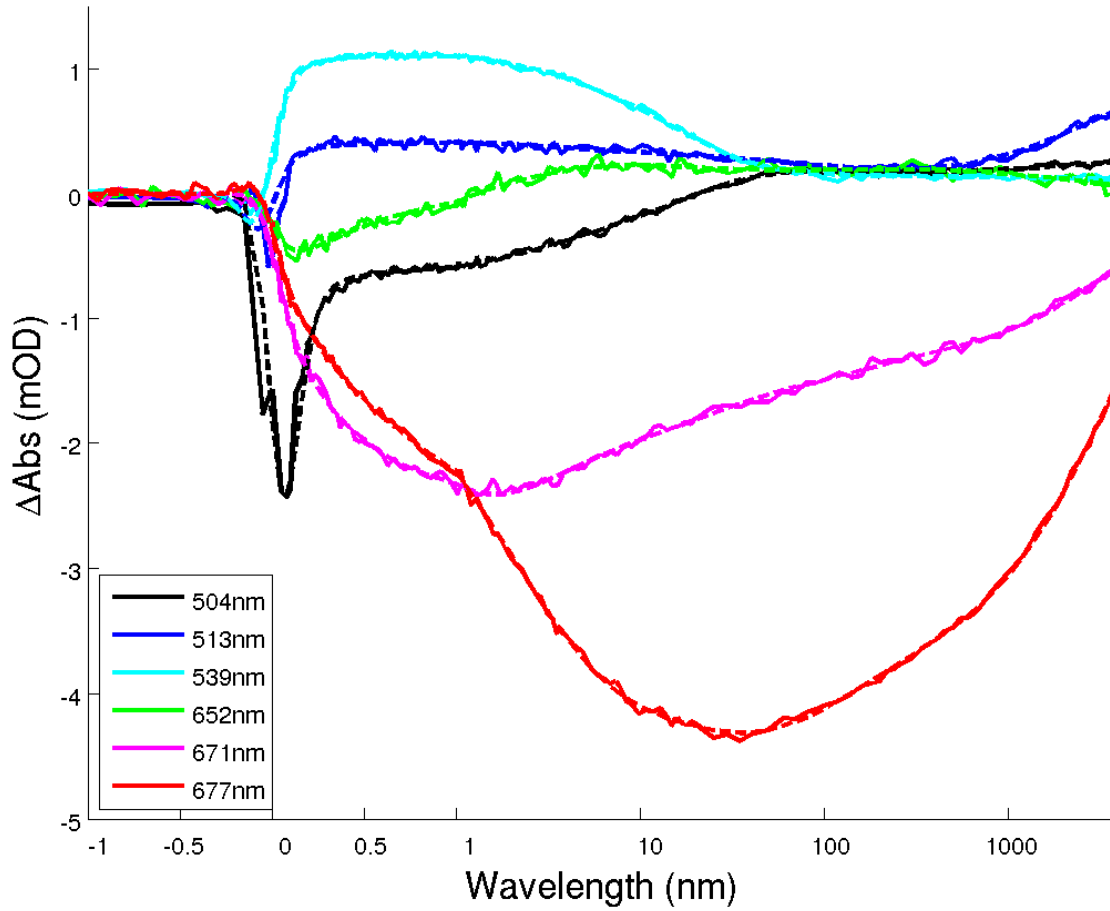

**FIGURE S2.** Pump probe traces (solid) and fit (dashed) of CP24 probed at selected wavelengths as indicated in the legend.

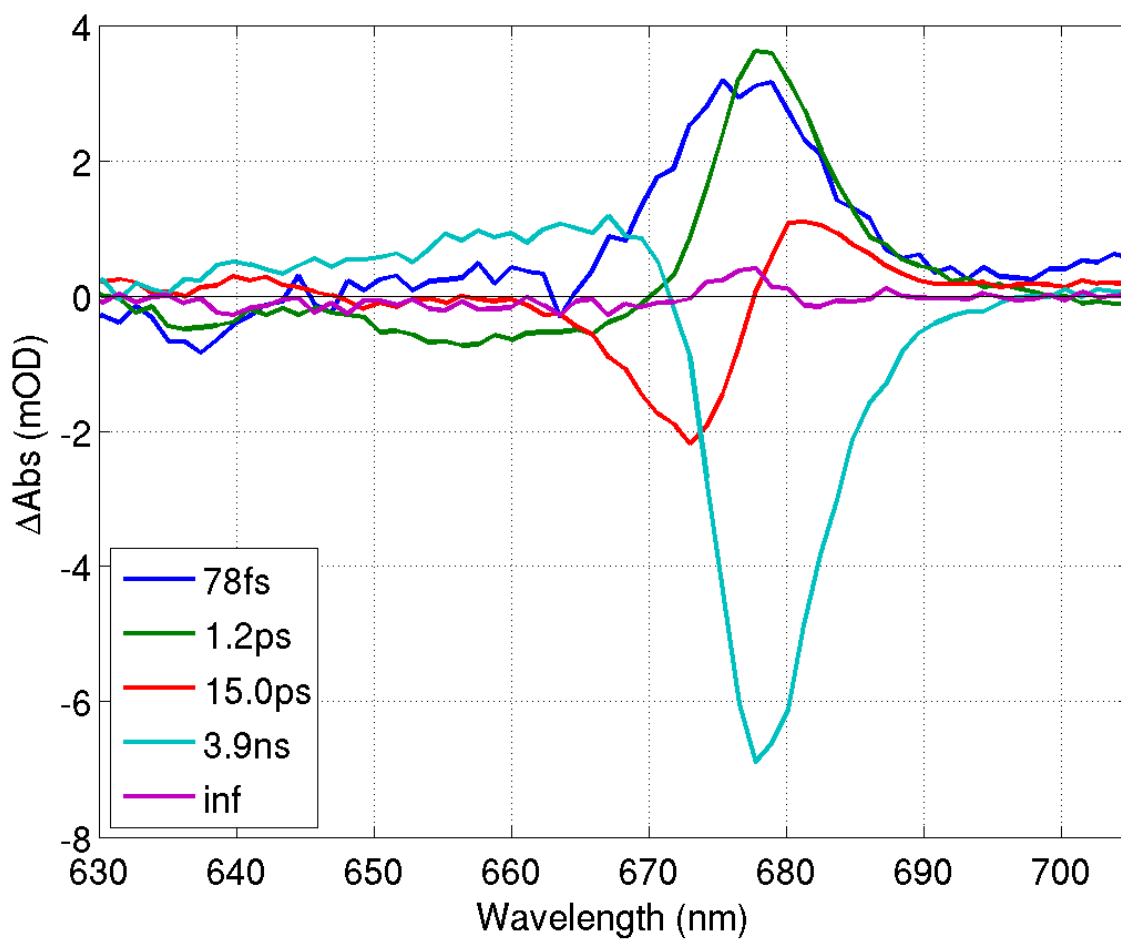

**FIGURE S3. Decay Associated Difference Spectra (DADS) of CP26 excited at 506 nm. The DADS are the plots associated to the exponential decays. Each DADS shows the decayed (negative) and gained (positive) signal in its corresponding transition.**

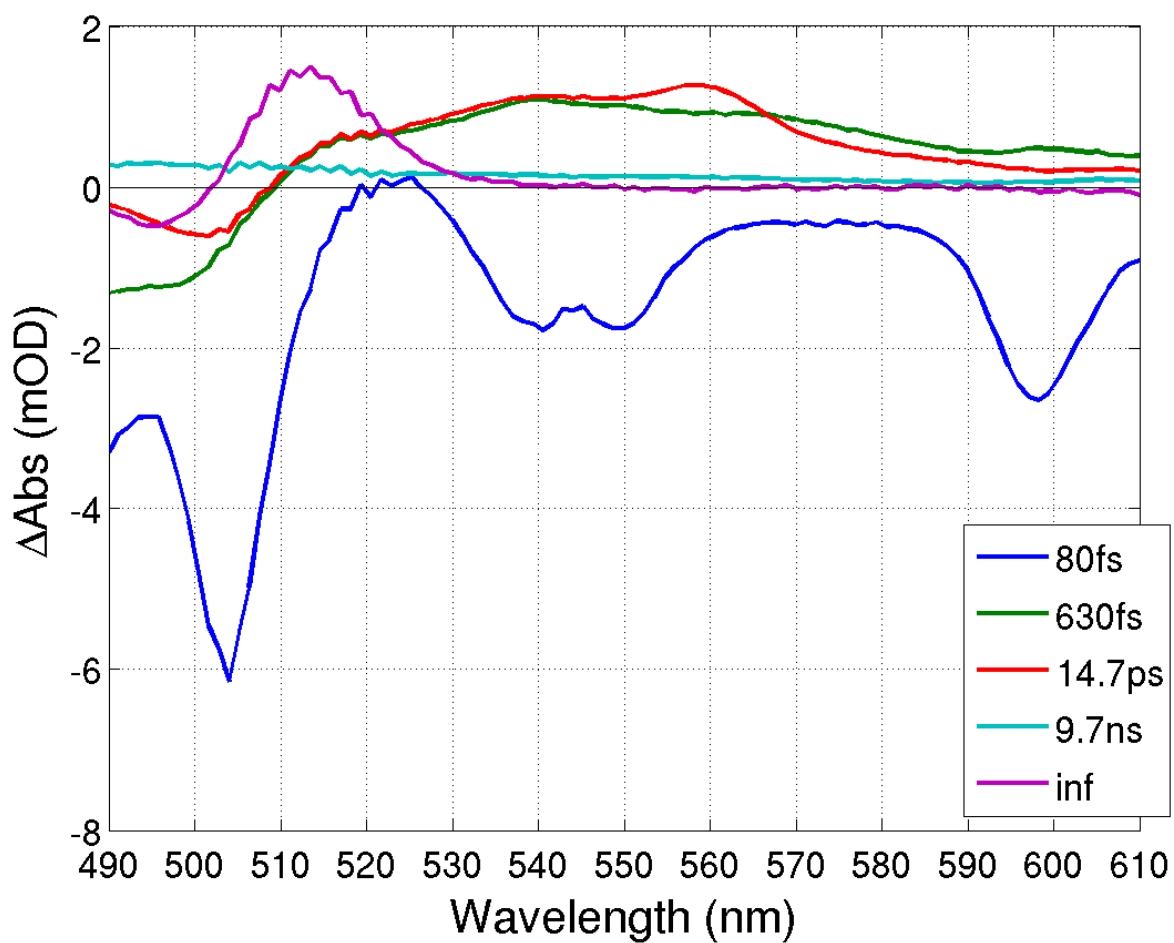

**FIGURE S4: Global analysis results (EADS and connecting lifetimes) of the pump-probe measurements on CP26 at 77K after 506 nm excitation. Only the 490-610 nm part of the spectrum was included in the fit.**

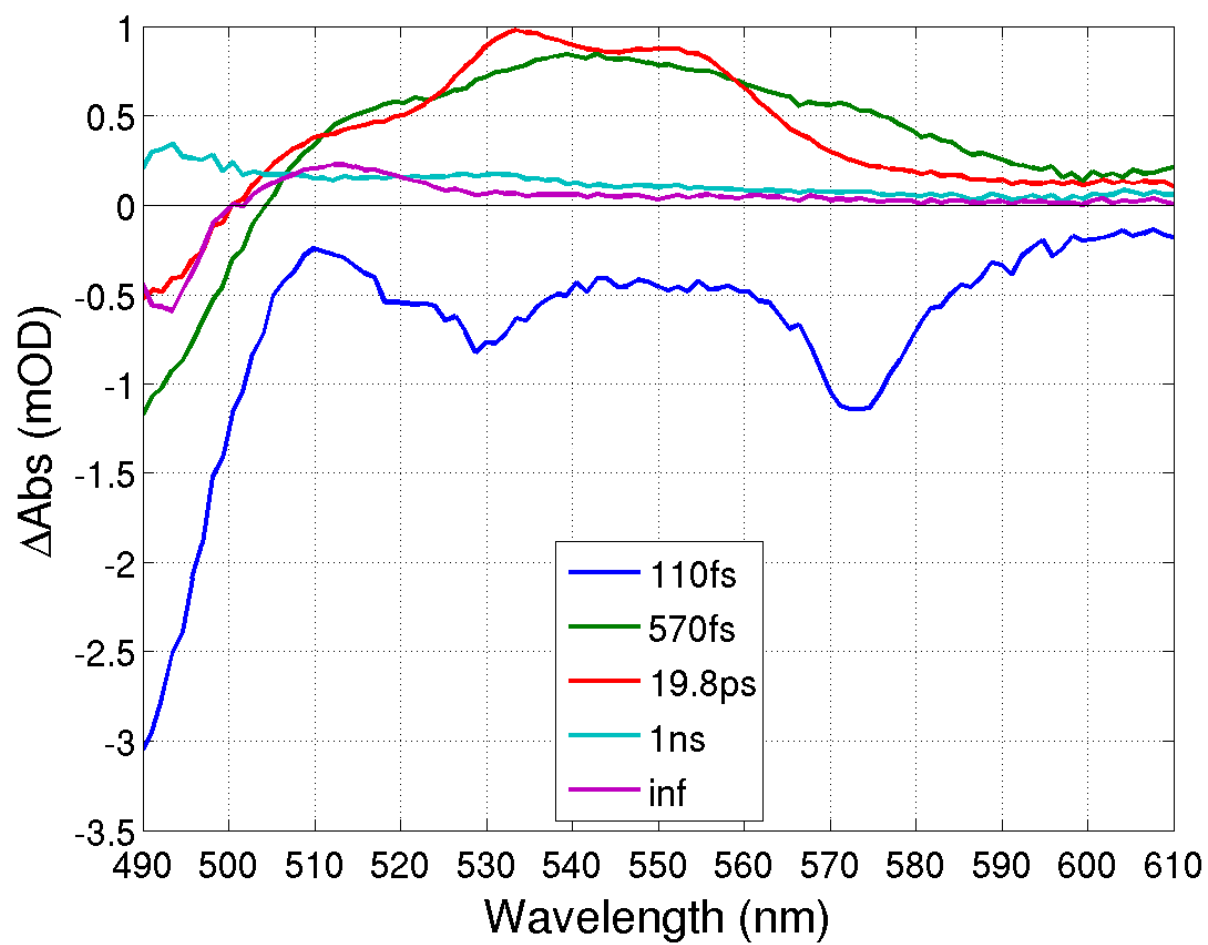

**FIGURE S5:** Global analysis results (EADS and connecting lifetimes) of the pump-probe measurements on CP24 at 77K after 490 nm excitation. Only the 490-610 nm part of the spectrum was included in the fit.
